# Supplementary material for: Surface reconstruction inducedin situphosphorus doping in nickel oxides for an enhanced oxygen evolution reaction
Source: Royal Society of Chemistry journal article supplement (doi:10.1039/d0ta10925h), 2021-01-01
Supplement: d0ta10925h1.pdf [file d0ta10925h1.pdf]

## Supporting Information

### Surface reconstruction induced in-situ phosphorus doping in nickel oxides for enhanced oxygen evolution reaction

Weiji Dai <sup>a,1</sup>, Xiaowan Bai <sup>b,1</sup>, Yin-an Zhu <sup>a</sup>, Yue Zhang <sup>a</sup>, Tao Lu <sup>a</sup>, Ye Pan <sup>a,\*</sup>, Jinlan Wang <sup>b,\*</sup>

<sup>a</sup> School of Materials Science and Engineering, Jiangsu Key Laboratory of Advanced Metallic Materials,

Southeast University, Nanjing, 211189, China

<sup>b</sup> School of Physics, Southeast University, Nanjing 211189, China

<sup>1</sup> Weiji Dai and Xiaowan Bai contributed equally to this work

\*Corresponding author: Ye Pan (panye@seu.edu.cn); Jinlan Wang (jllwang@seu.edu.cn)

#### 1. Electrochemical measurements

To prepare the CFP supported Ni<sub>5</sub>P<sub>4</sub> (Ni<sub>5</sub>P<sub>4</sub>@CFP) working electrode, 100 mg of Ni<sub>5</sub>P<sub>4</sub> pre-catalyst powders were dispersed in 2 ml ethanol and then ultrasonication for 20 min to get a homogeneous catalyst ink. Subsequently, 10 μL of the prepared catalyst ink was drop-cast onto a tailored CFP (0.5 × 1 cm<sup>2</sup> in working area) and dried naturally in the air. Thus, the mass loading of Ni<sub>5</sub>P<sub>4</sub> pre-catalyst on the CFP was 1 mg cm<sup>-2</sup>. In addition, the NiO@NF and P-NiO@NF were directly used as the working electrodes in this work.

The electrochemical measurements were conducted by using a CHI 660E electrochemistry workstation in standard three-electrode system at room temperature. A saturated Ag/AgCl electrode was used as the

reference electrode. To avoid the influence of counter electrode on experimental results, Pt sheet and carbon rod were used as the counter electrode, respectively. OER measurements were performed in 1 M KOH solution (pH = 13.8). The potential values were converted to the potential vs reversible hydrogen electrode (vs RHE) according to the equation:  $E(\text{RHE}) = E(\text{Ag}/\text{AgCl}) + 0.0591 \times \text{pH} + 0.197$ . Cyclic voltammetry (CV) scanning for calculating OER overpotential was conducted without iR compensation. Electrochemical impedance spectroscopy was recorded at the corresponding open circuit potential with an amplitude potential of 5 mV and scanning frequencies ranging from 0.01 Hz to 100 kHz.

## 2. The calculation details of Gibbs free energies

Computational hydrogen electrode (CHE) [1] model was used to calculate the Gibbs free energy change for OER elementary reactions. At electrode potential  $U = 0$  V (vs. reversible hydrogen electrode, RHE), the Gibbs free energy change ( $\Delta G$ ) can be calculated by

$$\Delta G = \Delta E + \Delta E_{\text{ZPE}} - T\Delta S \quad (1)$$

where  $\Delta E$  is the energy difference between the products and reactants from DFT computations;  $\Delta E_{\text{ZPE}}$  and  $\Delta S$  are the changes in zero-point energies and entropy, respectively, which are obtained from the vibrational frequency calculations;  $T$  is the temperature at 298 K. The energy corrections of gas-phase species in this work, including zero point energies and entropies, are listed in Table S2. The overpotential ( $\eta$ ),  $\eta = \Delta G_{\text{max}}/e$ , where  $\Delta G_{\text{max}}$  is the maximum free energy change among all elementary steps under standard electrode (reduction) potential. Refer to Lee's work in alkaline environment, the oxygen evolution reaction has four elementary steps in alkaline [2].  $\mu e^- - \mu(\text{OH}^-) - eU = 9.65$  eV was obtained by repeated calculations under standard electrode (reduction) potential ( $E^0 = 0.402$  V) at  $T = 298.15$  K.

The adsorption energy of \*OH ( $\Delta E$ ) on the catalyst surface was calculated by

$$\Delta E = E(*\text{OH}) - E(\text{surface}) - E(\text{OH}) \quad (2)$$

in which  $E(*\text{OH})$ ,  $E(\text{surface})$  and  $E(\text{OH})$  are the total energy of the catalyst surface with adsorbed OH, the catalyst surface and the energy of OH, respectively. Here,  $E(\text{OH}) = E(\text{H}_2\text{O}) - 1/2E(\text{H}_2)$ .

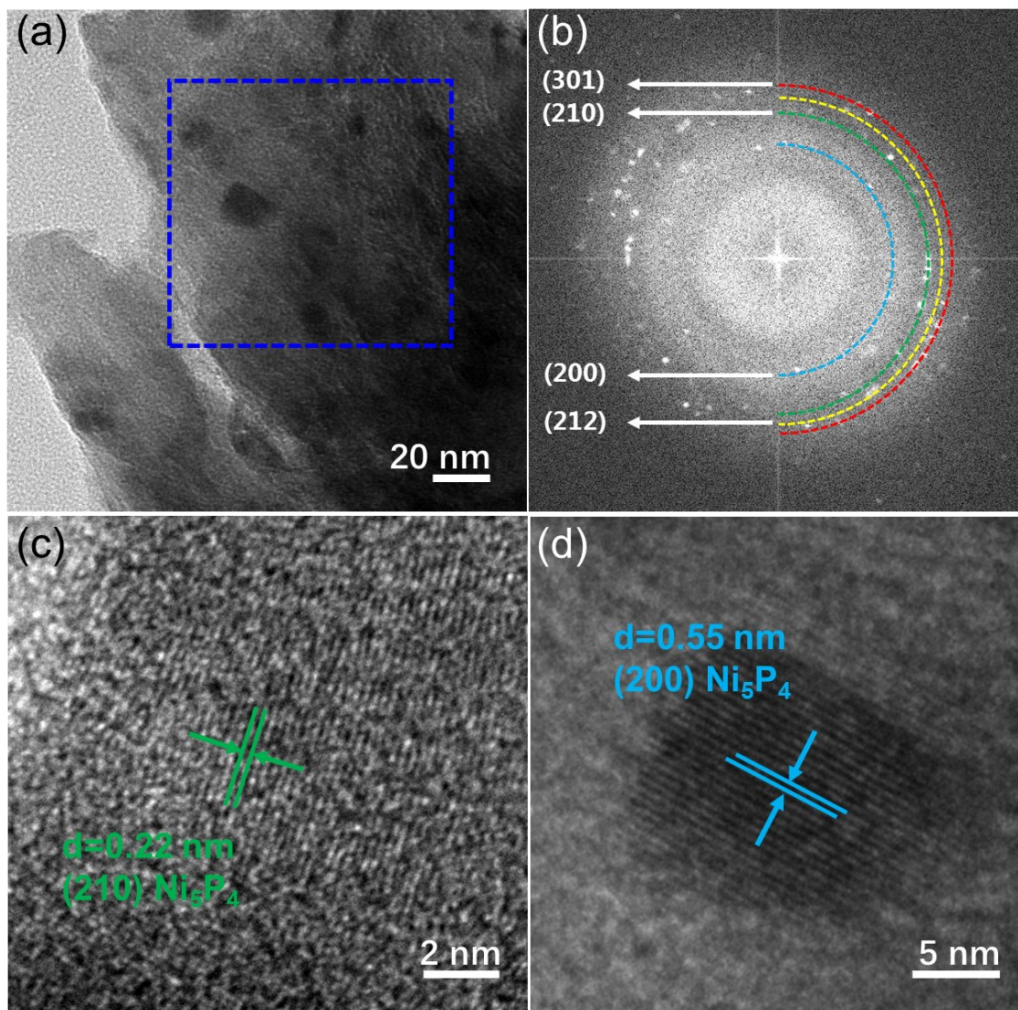

**Fig. S1.** (a) TEM image of  $\text{Ni}_5\text{P}_4$  powders synthesized by mechanical alloying. (b) SAED pattern of selected area in Fig. S1a. (c and d) HRTEM images of  $\text{Ni}_5\text{P}_4$  powders synthesized by mechanical alloying.

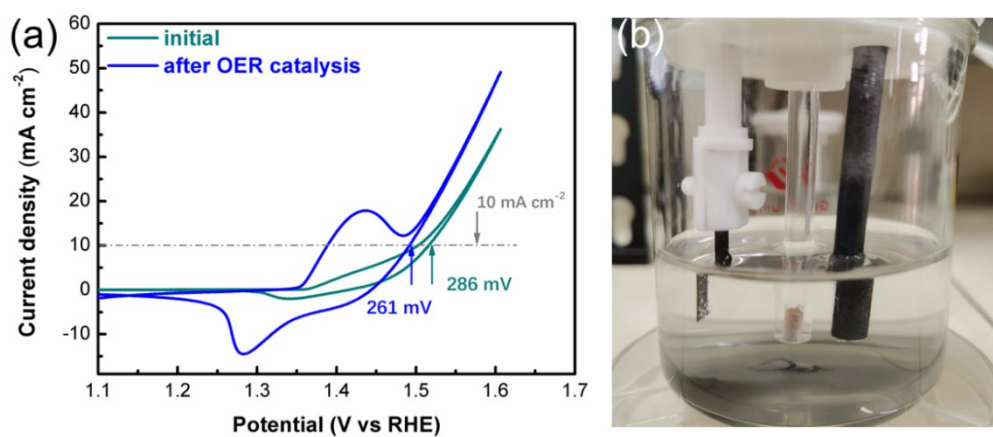

**Fig. S2.** (a) CV scanning curves of Ni<sub>3</sub>P<sub>4</sub>@CFP electrode with carbon rod as the counter electrode. (b)

Three-electrode system for OER electrocatalysis with carbon rod as counter electrode.

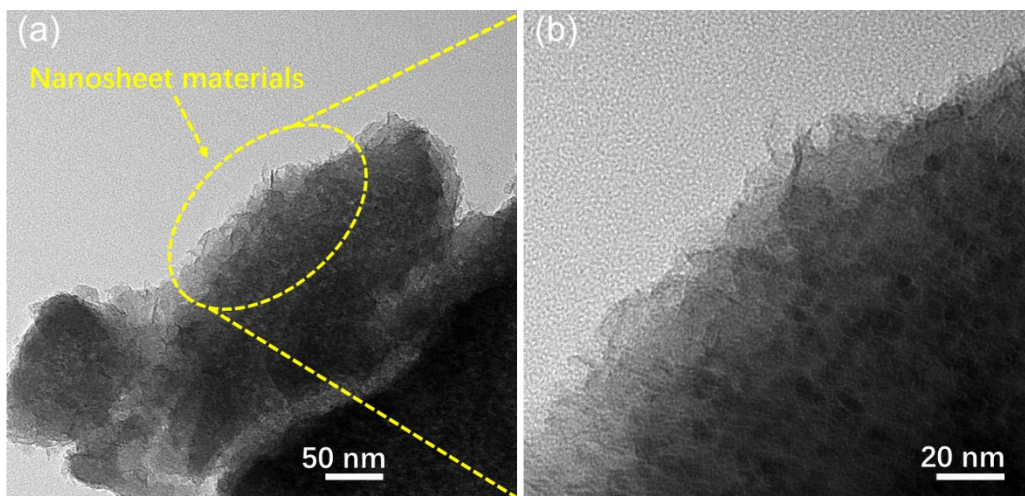

**Fig. S3.** (a and b) TEM images of derived NiO nanosheets after OER electrocatalysis.

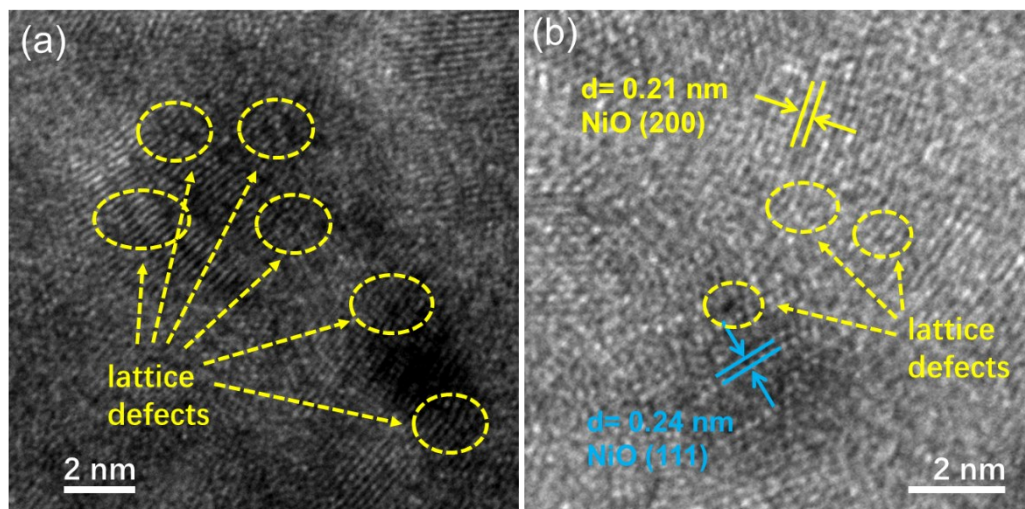

**Fig. S4.** (a and b) HRTEM images of derived NiO nanosheets after OER electrocatalysis.

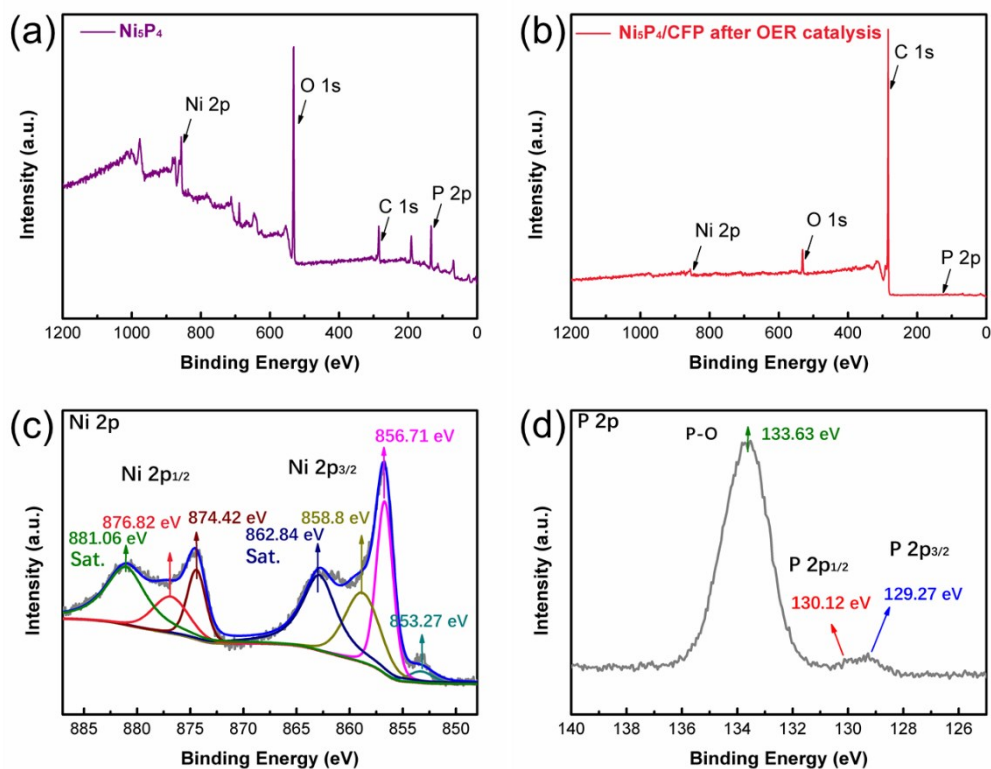

**Fig. S5.** XPS survey spectra of (a)  $\text{Ni}_5\text{P}_4$  powders synthesized by ball-milling reaction, (b)  $\text{Ni}_5\text{P}_4$  powders after the continuous OER electrocatalysis. (c) High resolution XPS spectra of (c) Ni 2p and (d) P 2p for the  $\text{Ni}_5\text{P}_4$  powders synthesized by ball-milling reaction.

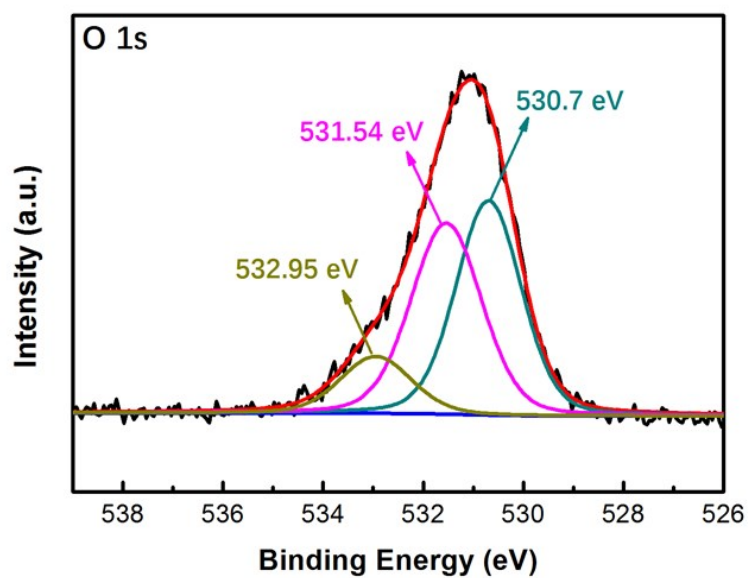

**Fig. S6.** High-resolution XPS spectra of O 1s for the  $\text{Ni}_5\text{P}_4$  powders after OER electrocatalysis.

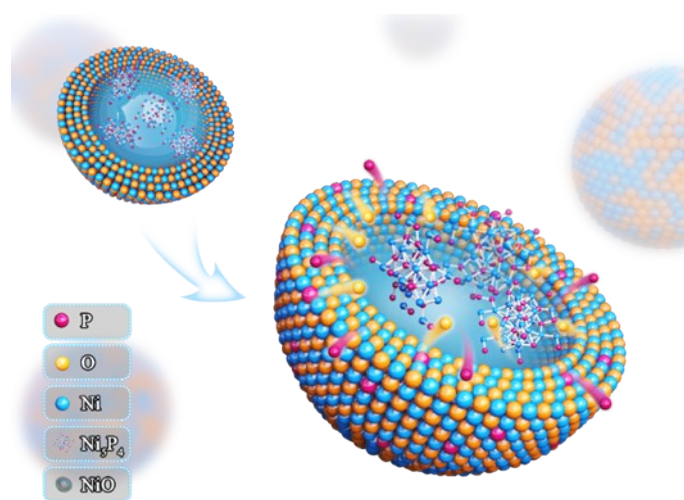

**Fig. S7.** Illustration of the surface reconstruction induces in-situ P doping into NiO crystal.



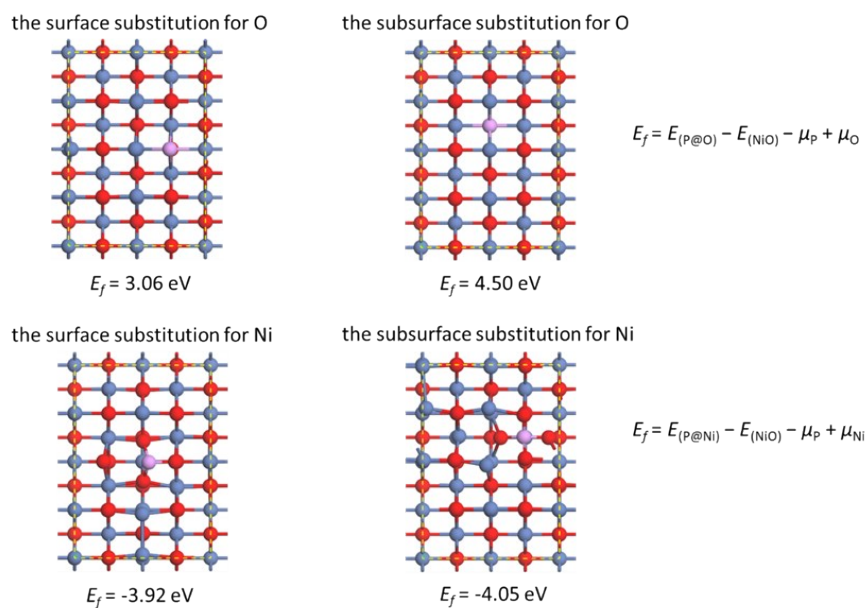

**Fig. S8.** The configurations and formation energies of different P substitution sites on the NiO(110) surface and subsurface. In this calculation,  $E_{(P@O/Ni)}$  is the total energy of NiO containing the dopant P and  $E_{(NiO)}$  is the total energy of the pure 64-atom NiO.  $\mu_P$ ,  $\mu_O$  and  $\mu_{Ni}$  is the chemical potential for black phosphorus,  $O_2$  and metal Ni, respectively.

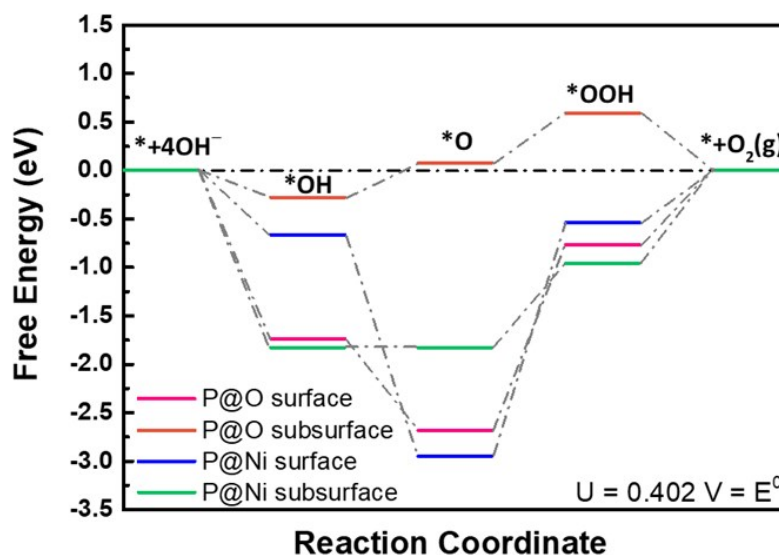

**Fig. S9.** The free energy diagram of different P substitution sites on the NiO(110) surface and subsurface at the equilibrium potential  $E^0 = 0.402$  V vs NHE.

**Table S1.** Bader charge in e for P-NiO(110) and NiO(110) without and with OH adsorption.

| P-NiO(110)                    | $N_e$ (e) | Structure                                                                         | NiO(110)                    | $N_e$ (e) | Structure                                                                           |
|-------------------------------|-----------|-----------------------------------------------------------------------------------|-----------------------------|-----------|-------------------------------------------------------------------------------------|
| Ni1                           | -0.68     | 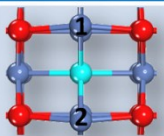 | Ni1                         | -1.14     |  |
| Ni2                           | -0.67     |                                                                                   | Ni2                         | -1.14     |                                                                                     |
| P                             | 0.03      |                                                                                   | O                           | 1.19      |                                                                                     |
| P-NiO(110) with OH adsorption | $N_e$     | Structure                                                                         | NiO(110) with OH adsorption | $N_e$     | Structure                                                                           |
| OH                            | 0.48      |  | OH                          | 0.57      |  |
| Ni1                           | -0.96     |                                                                                   | Ni1                         | -1.21     |                                                                                     |
| Ni2                           | -0.77     |                                                                                   | Ni2                         | -1.21     |                                                                                     |
| P                             | -0.02     |                                                                                   | O                           | 1.22      |                                                                                     |

**Table S2.** Total energies (E, eV), zero point energy (ZPE) corrections and entropic contributions (TS) ofH<sub>2</sub>O, H<sub>2</sub> and adsorbates to the free energies.

| Species                      | E (eV) | ZPE (eV) | TS (eV) |
|------------------------------|--------|----------|---------|
| H <sub>2</sub> O (0.035 bar) | -14.22 | 0.56     | 0.67    |
| H <sub>2</sub>               | -6.76  | 0.27     | 0.41    |
| P-NiO(110)                   |        |          |         |
| *O                           |        | 0.05     | 0.06    |
| *OH                          |        | 0.38     | 0.06    |
| *OOH                         |        | 0.43     | 0.25    |
| NiO(110)                     |        |          |         |
| *O                           |        | 0.06     | 0.06    |
| *OH                          |        | 0.38     | 0.06    |
| *OOH                         |        | 0.45     | 0.17    |

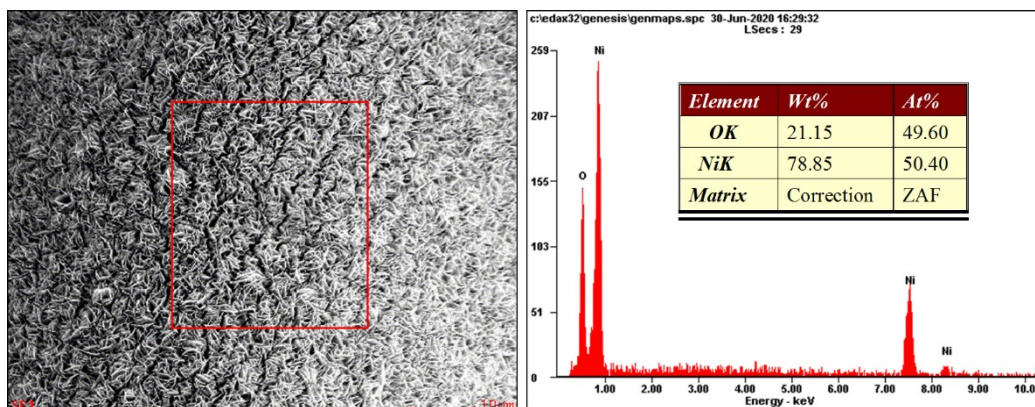

Fig. S10. EDS pattern of NiO@NF working electrode.

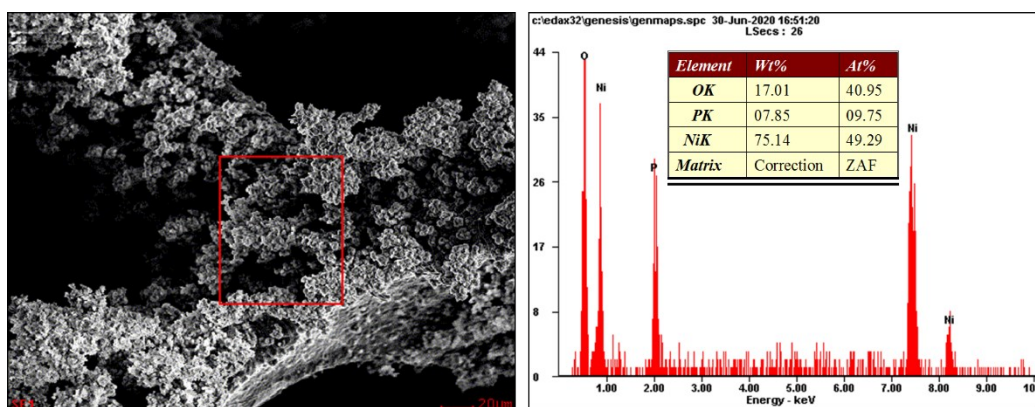

Fig. S11. EDS pattern of P-NiO@NF working electrode.

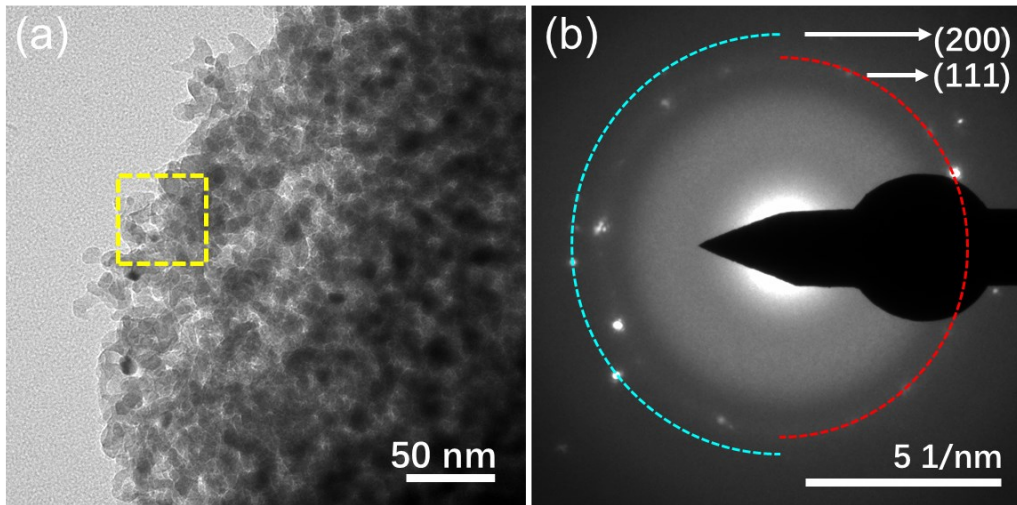

**Fig. S12.** TEM pattern. (a) TEM image of the coral-like materials on P-NiO@NF electrode, (b) SAED pattern of the coral-like materials on P-NiO@NF electrode as marked in (a).

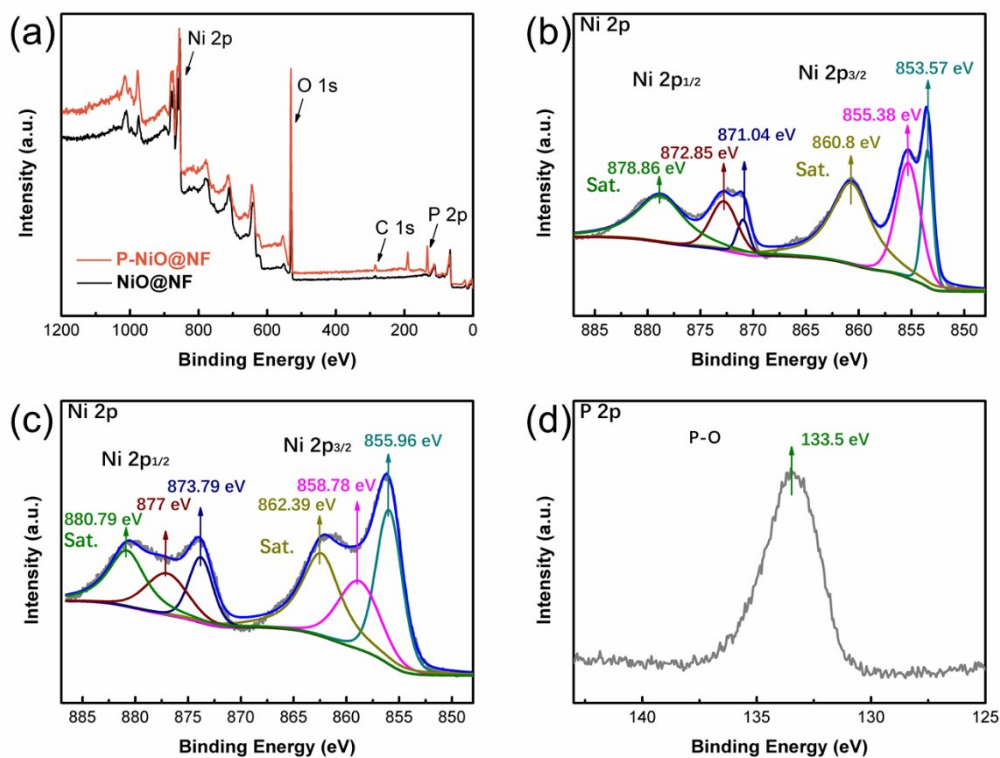

**Fig. S13.** (a) XPS survey spectra of NiO@NF and P-NiO@NF working electrodes. (b) High resolution XPS spectra of Ni 2p of NiO@NF electrode. High resolution XPS spectra of (c) Ni 2p and (d) P 2p for P-NiO@NF electrode.

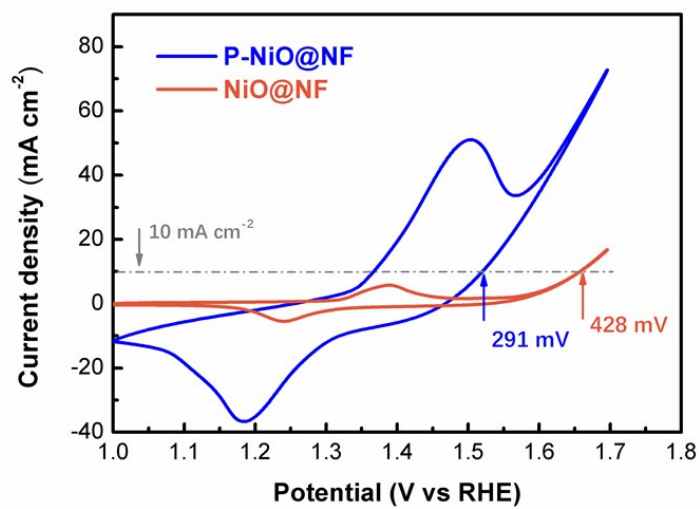

**Fig. S14.** CV scanning curves of NiO@NF and P-NiO@NF working electrodes with carbon rod as the counter electrode.

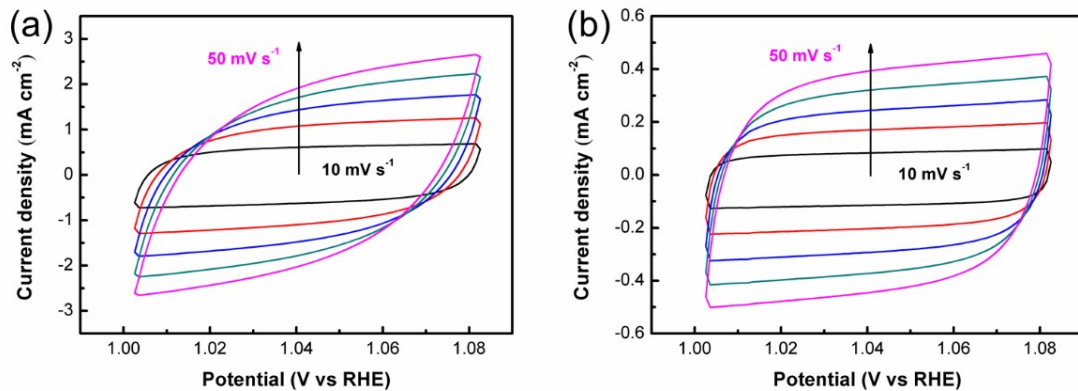

**Fig. S15.** CV scanning curves with a potential window of 1.00 to 1.08 V (vs RHE) at different scan rates

of 10, 20, 30, 40 and 50 mV s<sup>-1</sup>. (a) NiO@NF working electrode, (b) P-NiO@NF working electrode.

**Table S3.** Electrochemical OER performances comparison of Ni<sub>5</sub>P<sub>4</sub>@CFP, NiO@NF and P-NiO@NF working electrodes with some recently reported catalysts.

| Electrocatalysts                                                                                     | Electrolyte   | j/mA<br>cm <sup>-2</sup> | $\eta$ /mV | References                                                    |
|------------------------------------------------------------------------------------------------------|---------------|--------------------------|------------|---------------------------------------------------------------|
| Ni <sub>0.75</sub> Mn <sub>0.25</sub> oxides                                                         | 1M KOH        | 10                       | 297        | ACS Energy Lett. <b>2018</b> , 3, 2150–2158.                  |
| N-NiO                                                                                                | 1M KOH        | 10                       | 270        | ACS Appl. Mater. Interfaces <b>2019</b> , 11, 30865–30871.    |
| Cobalt phosphonate (CoPIII)                                                                          | 1M KOH        | 10                       | 334        | Chemical Engineering Journal 396 ( <b>2020</b> ) 125245.      |
| P-Co <sub>0.9</sub> Ni <sub>0.9</sub> Fe <sub>1.2</sub> NCs                                          | 1M KOH        | 10                       | 273.1      | Sci. China Mater. <b>2019</b> , 62(9): 1285–1296.             |
| SrCo <sub>0.85</sub> Fe <sub>0.1</sub> P <sub>0.05</sub> O <sub>3-<math>\delta</math></sub> nanofilm | 1M KOH        | 10                       | 290        | Applied Catalysis B: Environmental 272 ( <b>2020</b> ) 119046 |
| O-NiSe@Ni/SS                                                                                         | 1M KOH        | 10                       | 290        | Electrochimica Acta 353 ( <b>2020</b> ) 136519                |
| S-CoO <sub>x</sub> /NF                                                                               | 1M KOH        | 10                       | 370        | Nano Energy 71 ( <b>2020</b> ) 104652                         |
| 3-D PC-G@NiO nanosheets                                                                              | 1M KOH        | 10                       | 320        | Electrochimica Acta 342 ( <b>2020</b> ) 136118                |
| NiCo/NiCoO <sub>x</sub> @FeOOH                                                                       | 1M KOH        | 10                       | 278        | Electrochimica Acta 257 ( <b>2017</b> ) 1–8                   |
| CoO@FeOOH                                                                                            | 1M KOH        | 10                       | 255        | Electrochimica Acta 257 ( <b>2017</b> ) 356–363               |
| Ni(OH) <sub>2</sub> nanosheet                                                                        | 1M NaOH       | 10                       | 295        | Nanoscale, <b>2018</b> , 10, 5054–5059                        |
| <b>Ni<sub>5</sub>P<sub>4</sub>@CFP</b>                                                               | <b>1M KOH</b> | <b>10</b>                | <b>269</b> | <b>This work</b>                                              |
| <b>Ni<sub>5</sub>P<sub>4</sub>@CFP after OER electrocatalysis</b>                                    | <b>1M KOH</b> | <b>10</b>                | <b>240</b> | <b>This work</b>                                              |
| <b>NiO/NF</b>                                                                                        | <b>1M KOH</b> | <b>10</b>                | <b>415</b> | <b>This work</b>                                              |
| <b>P-NiO/NF</b>                                                                                      | <b>1M KOH</b> | <b>10</b>                | <b>286</b> | <b>This work</b>                                              |



## References

- [1]. Peterson, A. A.; Abild-Pedersen, F.; Studt, F.; Rossmeisl, J.; Nørskov, J. K. *Energy Environ. Sci.* **2010**, 3, 1311.
- [2]. Lee, C. H.; Jun, B.; Lee, S. U. *ACS Sustainable Chemistry & Engineering* **2018**, 6, 4973.
